# Supplementary material for: Minocycline promotes the generation of dendritic cells with regulatory properties
Source: PubMed Central journal article supplement (PMC5288151; doi:10.18632/oncotarget.10810), 2016-07-24
Supplement: oncotarget-07-52818-s001.pdf [file oncotarget-07-52818-s001.pdf]

## Minocycline promotes the generation of dendritic cells with regulatory properties

### Supplementary Material

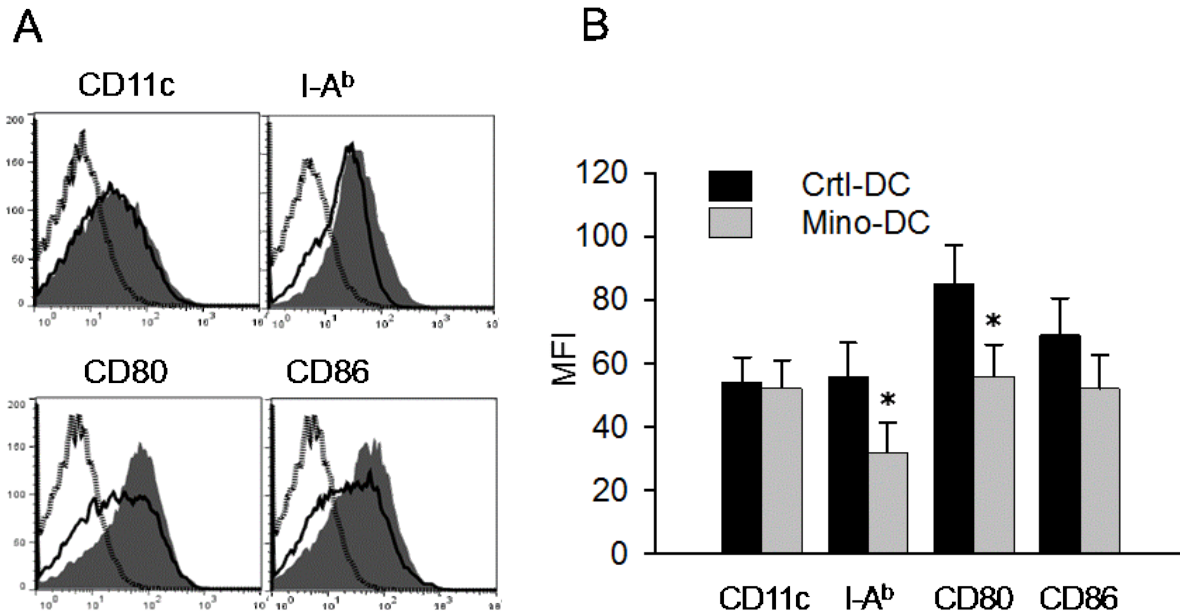

**Supplementary Figure S1.** Mino-DCs isolated from the spleens of mice treated with GM-CSF plus minocycline express significantly lower levels of I-A<sup>b</sup> and CD80 compared to Ctrl-DCs isolated from the spleens of mice treated with GM-CSF alone. (A) Ctrl-DCs, shaded area; Mino-DCs, black line; isotype-matched control, grey line. (B) Mean fluorescence intensities of DCs. The data are presented as the mean  $\pm$  SD of three independent experiments; \*P < 0.05 compared with control.
